# Supplementary material
Source: PubMed Central journal article supplement (PMC3320201)
Supplement: supp_pp.111.191288_191288Fig_S_Corn.pdf [file supp_pp.111.191288_191288Fig_S_Corn.pdf]

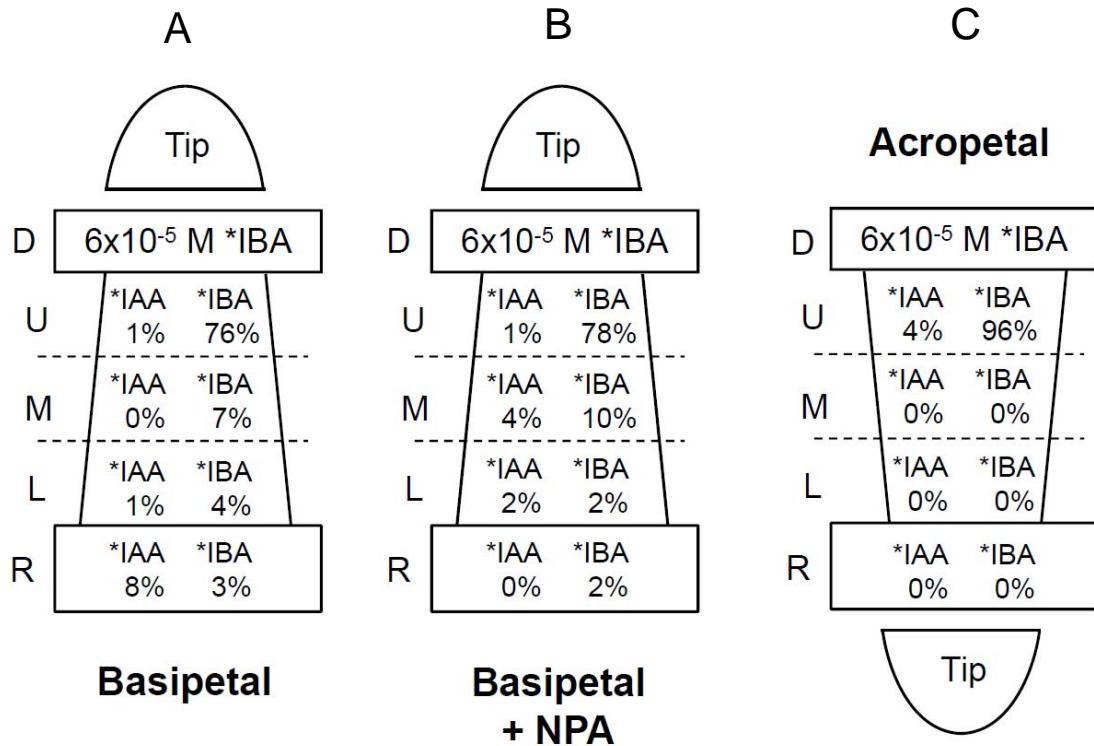

**Supplemental Figure 1.** Transport of free [<sup>13</sup>C<sub>8</sub>,<sup>15</sup>N<sub>1</sub>]IBA and [<sup>13</sup>C<sub>8</sub>,<sup>15</sup>N<sub>1</sub>]IAA derived from [<sup>13</sup>C<sub>8</sub>,<sup>15</sup>N<sub>1</sub>]IBA in maize coleoptiles after 3.5-h transport periods. Coleoptile tissues were collected from 6-day old dark-grown maize seedlings (cv. Silverqueen), and 6-mm sections were dissected 2-mm below the apical tips. Donor agar blocks containing 6 x 10<sup>-5</sup> M [<sup>13</sup>C<sub>8</sub>,<sup>15</sup>N<sub>1</sub>]IBA were placed on the apical end of coleoptile sections, while receiver agar blocks were placed on the basal end. After a 3.5-h transport period, the coleoptile sections were dissected into three 2-mm segments and collected separately for analysis. IBA and IAA were extracted and quantified from each of the 2-mm coleoptile segment and the receiver block exactly as previously described (Barkawi *et al.*, 2008). The enrichment of [<sup>13</sup>C<sub>8</sub>,<sup>15</sup>N<sub>1</sub>]IBA and [<sup>13</sup>C<sub>8</sub>,<sup>15</sup>N<sub>1</sub>]IAA over the unlabeled endogenous IBA and IAA pool was determined, and average values of three replicates are presented in the figure. Tip: the uppermost 2-mm coleoptile tissue; D: donor agar block; U: upper 2-mm coleoptile segment; M: middle 2-mm coleoptile segment; L: lower 2-mm coleoptile segment; R: receiver agar block. \*IBA represents [<sup>13</sup>C<sub>8</sub>,<sup>15</sup>N<sub>1</sub>]IBA; \*IAA represents [<sup>13</sup>C<sub>8</sub>,<sup>15</sup>N<sub>1</sub>]IAA derived from [<sup>13</sup>C<sub>8</sub>,<sup>15</sup>N<sub>1</sub>]IBA. (A) Basipetal transport of auxin. Both [<sup>13</sup>C<sub>8</sub>,<sup>15</sup>N<sub>1</sub>]IBA and [<sup>13</sup>C<sub>8</sub>,<sup>15</sup>N<sub>1</sub>]IAA derived from [<sup>13</sup>C<sub>8</sub>,<sup>15</sup>N<sub>1</sub>]IBA were transported into the receiver agar block. (B) Basipetal transport of auxin in the presence of 2 x 10<sup>-5</sup> M NPA. NPA added in the receiver agar block significantly reduced the transport of [<sup>13</sup>C<sub>8</sub>,<sup>15</sup>N<sub>1</sub>]IAA into the receiver agar block, but did not reduce the transport of [<sup>13</sup>C<sub>8</sub>,<sup>15</sup>N<sub>1</sub>]IBA. (C) Acropetal transport of auxin, a negative control where the orientation of coleoptile sections was reversed. [<sup>13</sup>C<sub>8</sub>,<sup>15</sup>N<sub>1</sub>]IBA or [<sup>13</sup>C<sub>8</sub>,<sup>15</sup>N<sub>1</sub>]IAA was not detected in the receiver, lower, or middle coleoptile segment.
